# Supplementary material for: Bacteriophage K1F targets Escherichia coli K1 in cerebral endothelial cells and influences the barrier function
Source: PubMed Central journal article supplement (PMC7264188; doi:10.1038/s41598-020-65867-4), 2020-06-01
Supplement: 41598_2020_65867_MOESM1_ESM.pdf [file 41598_2020_65867_MOESM1_ESM.pdf]

# Supplementary material

## Title

Bacteriophage K1F influences the barrier function of cerebral endothelial cells in an *in vitro* phage therapy model of neonatal meningitis.

## Authors

|                                           |                            |
|-------------------------------------------|----------------------------|
| Christian Møller-Olsen <sup>1</sup>       | ORCID: 0000-0002-6944-5601 |
| Toby Ross <sup>1</sup>                    | ORCID: 0000-0001-7277-6949 |
| Keith N. Leppard <sup>1</sup>             | ORCID: 0000-0003-2155-7919 |
| Veronica Foisor <sup>3</sup>              | ORCID: 0000-0001-7004-1324 |
| Corinne Smith <sup>1</sup>                | ORCID: 0000-0003-3364-7946 |
| Dimitris K. Grammatopoulos <sup>2,4</sup> | ORCID: 0000-0002-6296-8290 |
| Antonia P. Sagona <sup>1 *</sup>          | ORCID: 0000-0002-0386-2322 |

## Affiliations:

<sup>1</sup> School of Life Sciences, University of Warwick, Gibbet Hill Road, CV4 7AL, Coventry, UK

<sup>2</sup> Warwick Medical School, University of Warwick, Gibbet Hill Road, CV4 7AL, Coventry, UK

<sup>3</sup> Department of Chemistry, University of Warwick, Gibbet Hill Road, CV4 7AL, Coventry, UK

<sup>4</sup> Institute of Precision Diagnostics and Translational Medicine, Dept of Pathology, UHCW NHS Trust, Clifford Bridge Road, CV2 2DX, Coventry, UK

\* Corresponding author email: A.Sagona@warwick.ac.uk

Intracellular EV36-RFP in hCMECs,  
quantification by image analysis

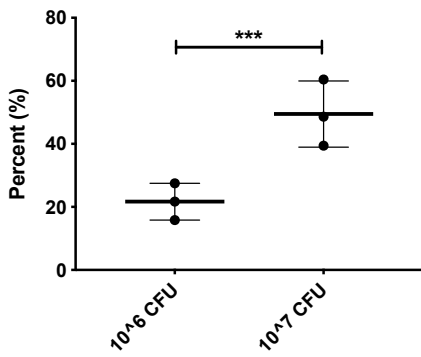

**Suppl. Figure 1.**

Image quantification of intracellular EV36-RFP of hCMECs. hCMEC cultures were incubated for 1 h with EV36-RFP at concentrations ranging from  $10^6$  to  $10^7$  CFU/ml. The cells were fixed and imaged and manual quantification was performed using the ImageJ software.

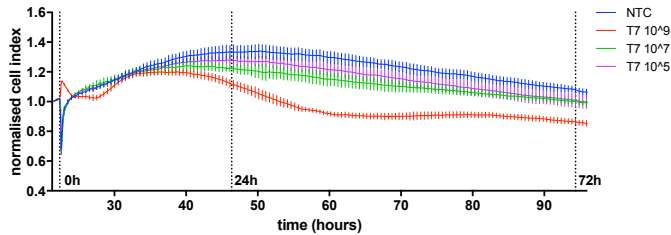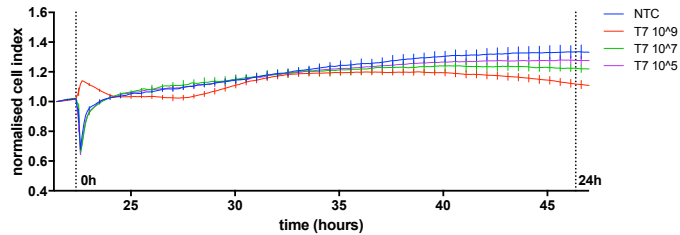

**Suppl. Figure 2.**

Temporal impedance profiles of hCMEC cultures, as measured using the xCELLigence system, incubated with phage T7 at a concentration range of  $10^5$  to  $10^9$  PFU/ml. NTC = Untreated hCMEC cultures. Vertical lines denote the addition of treatment at 0 h, and 24- and 72 h post treatment. The data is presented as the average normalised cell index across the acute (24 hours) and long-term (72 hours) incubate period (+/- SD, n > 3).

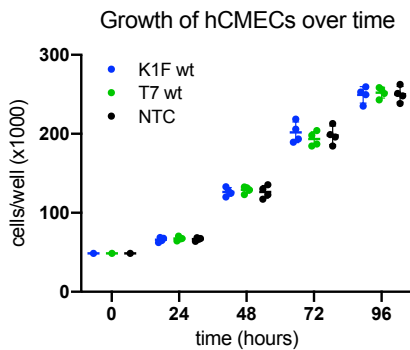

**Suppl. Figure 3.**

Growth of hCMEC cultures over times. Phages K1F or T7 were added to hCMEC cultures at a final concentration of  $10^9$  PFU/ml. NTC = untreated bacterial culture. +/- SD, n = 4 in each case.

| Phage preparation | Undiluted      | 10 <sup>7</sup> PFU/ml | 10 <sup>9</sup> PFU/ml |
|-------------------|----------------|------------------------|------------------------|
| Phage K1F-GFP     | 846 EU/ml      | 0.086 EU/ml            |                        |
| Phage K1F         | 303 EU/ml      | 0.0060 EU/ml           | 0.60 EU/ml             |
| Phage T7          | 523 EU/ml      | 0.013 EU/ml            | 1.3 EU/ml              |
|                   |                |                        |                        |
| Media/diluent     |                |                        |                        |
| EndoGRO media     | 0.15 EU/ml     |                        |                        |
| DEPC water        | 0.14 EU/ml     |                        |                        |
| SM-buffer         | < 0.04 EU/ml * |                        |                        |
| LB                | 0.19 EU/ml     |                        |                        |
| Leibovitz         | 0.12 EU/ml     |                        |                        |

#### Suppl. Figure 4.

Concentration of endotoxins in phage preparations, media and diluents. Concentrations listed for phage preparations at 10<sup>7</sup> and 10<sup>9</sup> are calculated from stock endotoxin levels based on PFU/ml of undiluted stock. \*Detection limit for the LAL Assay used is 0.04 EU/ml.

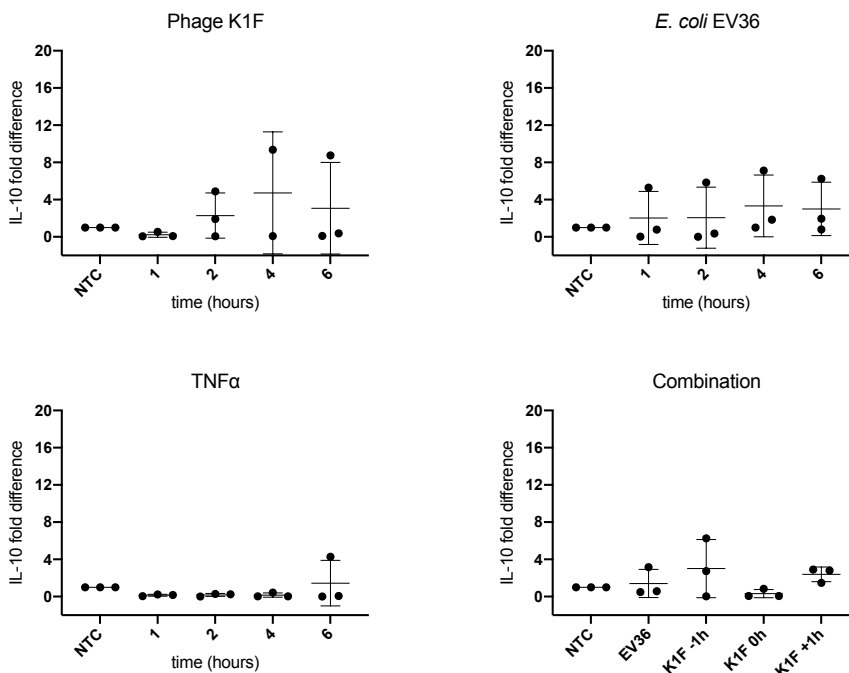

#### Suppl. Figure 5.

Expression pattern of IL-10 as measured by real-time qPCR. hCMEC cultures were incubated with 10<sup>7</sup> CFU/ml *E. coli* EV36, 10<sup>7</sup> PFU/ml phage K1F or 500 pg/ml TNF $\alpha$  and specific mRNA levels measured over time, or incubated with 10<sup>7</sup> CFU/ml *E. coli* EV36 having 10<sup>4</sup> PFU/ml phage K1F added 1 h before-, simultaneously-, or 1 h after bacterial addition, and incubated for 6 h before RNA harvest. Data were expressed relative to internal control (GAPDH) and then normalised to the untreated control value.
